# Supplementary material for: Critical contribution of chemically diverse carbonyl molecules to the oxidative potential of atmospheric aerosols
Source: Copernicus journal article supplement (doi:10.5194/egusphere-2024-37), 2024-03-06
Supplement: Supplementary file 1 [file egusphere-2024-37-supplement.pdf]

## *Supporting Information for*

# **Critical contribution of chemically diverse carbonyl molecules to the oxidative potential of atmospheric aerosols**

5 Feifei Li<sup>1,2</sup>, Shanshan Tang<sup>3</sup>, Jitao Lv<sup>1,2</sup>, Shiyang Yu<sup>1,2</sup>, Xu Sun<sup>1,4</sup>, Dong Cao<sup>1</sup>, Yawei Wang<sup>1,2,5</sup>, Guibin Jiang<sup>1,2,5</sup>

<sup>1</sup>State Key Laboratory of Environmental Chemistry and Eco-toxicology, Research Center for Eco-environmental Sciences, Chinese Academy of Sciences, Beijing 100085, China

<sup>2</sup>College of Resources and Environment, University of Chinese Academy of Sciences, Beijing 100049, China

10 <sup>3</sup>Collaborative Center for Physics and Chemistry, Institute of International Innovation, Beihang University, Yuhang District, Hangzhou 311115, China

<sup>4</sup>Beijing Urban Ecosystem Research Station, State Key Laboratory of Urban and Regional Ecology, Research Center for Eco-Environmental Sciences, Chinese Academy of Sciences, Beijing 100085, China

<sup>5</sup>School of Environment, Hangzhou Institute for Advanced Study, University of Chinese Academy of Sciences, Hangzhou 310024, China

15 *Correspondence to:* Jitao Lv ([jtlv@rcees.ac.cn](mailto:jtlv@rcees.ac.cn)) and Yawei Wang ([ywwang@rcees.ac.cn](mailto:ywwang@rcees.ac.cn))

## List of supporting information

### Texts

Text S1: Chemicals.

20 Text S2: Solid phase extraction procedure.

Text S3: ESI-FT-ICR MS analysis.

Text S4: Reduction of the carbonyl group by NaBH<sub>4</sub>.

Text S5: Supplement statistical analysis.

### Tables

25 Table S1: Detailed information on representative PM<sub>2.5</sub> samples.

### Figures

Figure S1: UV-Vis spectra during SRNOM reduction by NaBH<sub>4</sub>.

Figure S2: Derivatization reaction scheme of PFBHA and carbonyl molecules.

Figure S3: Reproducibility of DTT measurements of samples.

30 Figure S4: Validation plot of PLSR model for carbonyl molecules significantly positively correlated with DTT<sub>OC</sub>.

Figure S5: PCA score plots for pro-oxidative carbonyls.

Figure S6: Multivariate OPLS-DA (1 + 1 + 0) models for the pro-oxidative carbonyls.

Figure S7: Daily PM<sub>2.5</sub> concentration at the downtown site, suburban site, and montane site in Beijing during each sampling season.

35 Figure S8: The proportion of molecules in seven compounds was estimated based on the normalized molecular intensities.

Figure S9: Seven compounds differ in the percentage distribution of all organic, non-carbonyl, and carbonyl molecules based on the normalized molecular intensities.

Figure S10: The proportion of each group in all organic, non-carbonyl, and carbonyl molecules was estimated based on the normalized molecular intensities.

40 Figure S11: Differences in the percentage distribution of elemental composition based on the normalized molecular intensities in all organic, non-carbonyl, and carbonyl molecules.

Figure S12: DTT consumption rates of organic in PM<sub>2.5</sub> over Beijing at the downtown site, suburban site, and montane site.

Figure S13: The magnitude-weighted average parameters of carbonyl molecules.

45 Figure S14: The difference in the percentage distribution based on the normalized molecular intensities of carbonyl molecules in winter, winter Olympics, and summer samples for the seven compound groups.

Figure S15: The van Krevelen diagram of carbonyl molecules from different elemental compositions.

Figure S16: Spearman correlation matrix of carbonyl molecule characteristic parameters and DTT<sub>OC</sub>.

Figure S17: OPLS-DA score plots for normalized intensity of individual pro-oxidative carbonyls.

### Text S1: Chemicals

50 Ultrapure water (18.2 M $\Omega$ ·cm) was supplied by a Milli-Q water 100 purification system. Acetonitrile and methanol (HPLC grade) were obtained from Fisher. *O*-(2,3,4,5,6-Pentafluorobenzyl)hydroxylamine hydrochloride (PFBHA,  $\geq 99\%$ , CAS 57981-02-9) obtained from Sigma-Aldrich and Sodium borohydride (NaBH<sub>4</sub>,  $\geq 98\%$ , CAS 16940-66-2) obtained from Sinopharm Chemical Reagent Co. LTD.

55 Dithiothreitol (DTT,  $\geq 99.4\%$ , Biotechnology grade, Amresco), Diethylenetriaminepentaacetic acid (DTPA,  $\geq 99\%$ , CAS 67-43-6, Sigma-Aldrich), 5,5-Dithiobis(2-nitrobenzoic acid) (DTNB,  $> 99\%$ , CAS 69-78-3, J&K Scientific) and phosphate buffer saline (PBS, 0.1M, pH 7.2-7.4, Solarbio) were used to measure the OP of PM<sub>2.5</sub> samples.

### Text S2: Solid phase extraction procedure

The water-soluble fraction of PM<sub>2.5</sub> was desalted and purified using Varian Bond Elute PPL cartridges (200 mg per 3 mL). Briefly, the cartridges were rinsed with 3 mL of methanol (MS grade) and 9 ml of ultrapure water (pH 2) prior to use. The 60 samples were acidified to pH 2 with HCl (32%, ultrapure) to increase the extraction efficiency for organic acids and phenols, and 20 mL were passed through the cartridges by gravity at a flow rate of approximately 2 mL min<sup>-1</sup>. Cartridges were rinsed with three volumes of 0.01 M HCl for removal of salts, dried with a stream of N<sub>2</sub>, and immediately extracted with two volumes of methanol (MS grade). The extracted WEOM samples were stored at -4 °C in the dark, and the WISOM was concentrated with N<sub>2</sub> to 1 mL and then stored at -4 °C in the dark.

### 65 Text S3: ESI-FT-ICR MS analysis

Samples for ESI FT-ICR-MS analysis were continuously infused into the ESI unit by syringe infusion at a flow rate of 120  $\mu\text{L h}^{-1}$ . The ESI needle voltage was set to -3.8 kV. All the samples were analyzed in negative ionization mode with broadband detection. Ions accumulated in a hexapole ion trap for 0.2 s before being introduced into the ICR cell. The lower mass limit was set to  $m/z = 120$  Da and the upper mass limit to  $m/z = 920$  Da. 300 mass spectra were averaged per sample. 70 The spectra were externally calibrated with 10 mM of sodium formate solution in 50% isopropyl alcohol using a linear calibration and then internally recalibrated using an in-house reference mass list. After internal calibration, the mass error was  $< 0.5$  ppm over the entire mass range.

Based on previous studies, the following sample molecular parameters were calculated:

$$\text{DBE} = 1 + \frac{2C-H+N}{2} \text{ (Lv et al., 2016)}$$

75 
$$\text{AImod} = (1 + C - \frac{0}{2} - \frac{H}{2} - S) / (C - \frac{0}{2} - N - S) \text{ (Wang et al., 2021)}$$

$$\text{NOSC} = 4 - [(4C + H - 3N - 2O - 2S) / C] \text{ (Zhang et al., 2023)}$$

$$\overline{\text{OS}}_C \approx 2\frac{O}{2} - \frac{H}{2} \text{ (Kroll et al., 2011)}$$

Where C, H, N, O, and S represent the numbers of carbon, hydrogen, nitrogen, oxygen, and sulfur atoms in each formula.

80 The magnitude-weighted average parameters such as C, H, O, N, S, MW, O/C, H/C, NO<sub>SC</sub>, A<sub>Imod</sub>, and DBE for each sample can be determined by the following formula:

$$(M)_w = [\sum_i I_i \times (M)_i] / \sum_i I_i$$

where  $I_i$  and  $(M)_i$  are the relative abundance and M value of peak  $i$ , respectively. The relative abundance is calculated as the abundance of the individual peak divided by the maximum abundances in a given spectrum. (Lv et al., 2016)

#### **Text S4: Reduction of the carbonyl group by NaBH<sub>4</sub>**

85 The aqueous solution of SRNOM was de-oxygenated by nitrogen purging for 15 min, and an excess of NaBH<sub>4</sub> was added under nitrogen protection and reacted in the dark. (Phillips and Smith, 2014, 2015)

Changes in light absorption during reduction were monitored using UV 3600 (Shimadzu, Japan) to determine the mass and time of NaBH<sub>4</sub> required for the carbonyl group to be completely reduced. The mass ratios of NaBH<sub>4</sub> to SRNOM were set to 1:1, 10:1, and 20:1, and the UV-vis absorbances after the reactions of 0.2H, 2H, and 12H were recorded, respectively  
90 (Figure S3). It can be found that the absorbances of the mass ratios of 10:1 and 20:1 were the same after the reaction 12H, so NaBH<sub>4</sub> at 10 times the sample mass completely consumed the carbonyl group in the sample after the reaction 12H.

#### **Text S5: Supplement statistical analysis**

The pro-oxidative carbonyls are screened by the following steps. Carbonyl molecules with more than 50% detection rate in all samples were first filtered as common molecules (1314), and the correlation between the normalized molecular intensity  
95 of common carbonyl molecules and DTT<sub>OC</sub> was analyzed by Spearman rank correlation. Due to the large dataset, the use of the FDR method can reduce the false positive results during multiple hypothesis testing in large datasets. The p-values in Spearman's rank correlation results were corrected by FDR and labeled as p<sub>fdr</sub>. A total of 705 carbonyl molecules were screened for significant positive correlation with DTT<sub>OC</sub> based on p<sub>fdr</sub> < 0.05 and Spearman's r > 0. Next, the PLSR model was used to select the key variables among oxidation potential-related carbonyl molecules to avert the influence of  
100 collinearity in multivariate correlation analysis. The criterion for screening important variables was set as a VIP > 1, which screened a total of 380 pro-oxidative carbonyls. The results of 999-time permutation tests indicated that the PLSR model was valid and non-overfit (Figure S4).

The samples were categorized into winter, Winter Olympics, and summer groups according to the sampling time, and no outliers were detected by the quality assessment of the sample variants by the PCA model (Figure S5). Further multivariate  
105 OPLS-DA (1 + 1 + 0) models explained the seasonal differences in the abundance of pro-oxidative carbonyls (Figure S17), and the model was validated by permutation tests (n=200) (Figure S6).

| Sampling site | Sampling number | Sampling season | Data         |              | TOC (mg/L) | WSOM                            |                                             | WISOM                                       | Number of carbonyl molecules | Number of non-carbonyl molecules | Number of all molecules |
|---------------|-----------------|-----------------|--------------|--------------|------------|---------------------------------|---------------------------------------------|---------------------------------------------|------------------------------|----------------------------------|-------------------------|
|               |                 |                 |              |              |            | DTT <sub>m</sub> (pmol/min/ngC) | DTT <sub>v</sub> (pmol/min/m <sup>3</sup> ) | DTT <sub>v</sub> (pmol/min/m <sup>3</sup> ) |                              |                                  |                         |
| Mountain site | M-1             | Winter          | 19 Jan. 2022 | 20 Jan. 2022 | 116.40     | 66.33                           | 150.26                                      | 110.51                                      | 2051                         | 8308                             | 10359                   |
|               | M-2             | Winter          | 23 Jan. 2022 | 24 Jan. 2022 | 323.20     | 37.81                           | 178.37                                      | 104.45                                      | 1768                         | 8633                             | 10401                   |
|               | M-3             | Winter          | 31 Jan. 2022 | 1 Feb. 2022  | 42.94      | 55.41                           | 17.36                                       | 16.58                                       | 1585                         | 5784                             | 7369                    |
|               | M-4             | Olympics        | 9 Feb. 2022  | 10 Feb. 2022 | 199.10     | 43.72                           | 127.06                                      | 73.52                                       | 1795                         | 8032                             | 9827                    |
|               | M-5             | Olympics        | 6 Feb. 2022  | 14 Feb. 2022 | 61.17      | 57.89                           | 25.84                                       | 14.13                                       | 1645                         | 6781                             | 8426                    |
|               | M-6             | Olympics        | 8 Feb. 2022  | 18 Feb. 2022 | 115.27     | 64.88                           | 54.58                                       | 22.03                                       | 1764                         | 8345                             | 10109                   |
|               | M-7             | Summer          | 10 Jul. 2022 | 27 Jul. 2022 | 130.07     | 7.96                            | 7.40                                        | 3.57                                        | 1230                         | 7119                             | 8349                    |
|               | M-8             | Summer          | 16 Jul. 2022 | 24 Jul. 2022 | 166.13     | 10.70                           | 25.40                                       | 8.61                                        | 1396                         | 8442                             | 9838                    |
|               | M-9             | Summer          | 11 Jul. 2022 | 20 Jul. 2022 | 166.33     | 8.97                            | 21.31                                       | 11.58                                       | 1612                         | 7810                             | 9422                    |
| Suburban site | S-1             | Winter          | 19 Jan. 2022 | 20 Jan. 2022 | 189.30     | 57.98                           | 160.19                                      | 29.81                                       | 1825                         | 7572                             | 9397                    |
|               | S-2             | Winter          | 23 Jan. 2022 | 24 Jan. 2022 | 488.70     | 40.18                           | 286.58                                      | 159.05                                      | 1306                         | 8839                             | 10145                   |
|               | S-3             | Winter          | 31 Jan. 2022 | 1 Feb. 2022  | 41.30      | 84.16                           | 50.73                                       | 14.40                                       | 1809                         | 7083                             | 8892                    |
|               | S-4             | Olympics        | 9 Feb. 2022  | 10 Feb. 2022 | 328.10     | 52.44                           | 251.07                                      | 89.09                                       | 1579                         | 7821                             | 9400                    |
|               | S-5             | Olympics        | 6 Feb. 2022  | 14 Feb. 2022 | 82.57      | 58.75                           | 35.40                                       | 17.16                                       | 1769                         | 7501                             | 9270                    |
|               | S-6             | Olympics        | 8 Feb. 2022  | 18 Feb. 2022 | 93.19      | 57.88                           | 78.72                                       | 43.25                                       | 1714                         | 7138                             | 8852                    |
|               | S-7             | Summer          | 10 Jul. 2022 | 27 Jul. 2022 | 112.07     | 11.57                           | 9.26                                        | 8.28                                        | 1185                         | 7680                             | 8865                    |
|               | S-8             | Summer          | 16 Jul. 2022 | 24 Jul. 2022 | 213.23     | 11.54                           | 35.14                                       | 19.89                                       | 1676                         | 8227                             | 9903                    |
|               | S-9             | Summer          | 11 Jul. 2022 | 20 Jul. 2022 | 136.73     | 10.98                           | 21.79                                       | 15.27                                       | 1433                         | 7489                             | 8922                    |
| Downtown site | D-1             | Winter          | 19 Jan. 2022 | 20 Jan. 2022 | 162.20     | 52.87                           | 166.87                                      | 101.65                                      | 1686                         | 7104                             | 8790                    |
|               | D-2             | Winter          | 23 Jan. 2022 | 24 Jan. 2022 | 391.30     | 37.80                           | 215.90                                      | 116.35                                      | 1705                         | 8218                             | 9923                    |
|               | D-3             | Winter          | 31 Jan. 2022 | 1 Feb. 2022  | 85.70      | 45.42                           | 56.81                                       | 33.85                                       | 1290                         | 6222                             | 7512                    |
|               | D-4             | Olympics        | 9 Feb. 2022  | 10 Feb. 2022 | 263.40     | 51.40                           | 197.59                                      | 122.90                                      | 1640                         | 7699                             | 9339                    |
|               | D-5             | Olympics        | 6 Feb. 2022  | 14 Feb. 2022 | 106.87     | 36.76                           | 28.67                                       | 16.19                                       | 1501                         | 6518                             | 8019                    |
|               | D-6             | Olympics        | 8 Feb. 2022  | 18 Feb. 2022 | 74.79      | 71.00                           | 77.50                                       | 42.01                                       | 1379                         | 7894                             | 9273                    |
|               | D-7             | Summer          | 10 Jul. 2022 | 27 Jul. 2022 | 134.07     | 12.57                           | 12.04                                       | 8.94                                        | 1354                         | 7687                             | 9041                    |
|               | D-8             | Summer          | 16 Jul. 2022 | 24 Jul. 2022 | 230.73     | 11.29                           | 37.21                                       | 20.04                                       | 1770                         | 8227                             | 9997                    |
|               | D-9             | Summer          | 11 Jul. 2022 | 20 Jul. 2022 | 306.97     | 9.90                            | 21.72                                       | 15.33                                       | 1092                         | 8585                             | 9677                    |

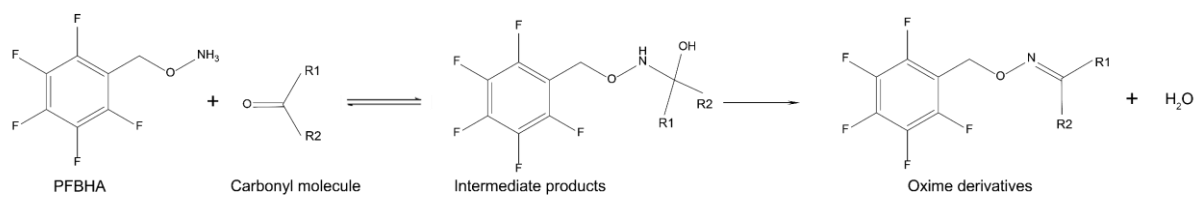

**Figure S1. Derivatization reaction scheme of PFBHA and carbonyl molecules.**

110

115

120

125

130

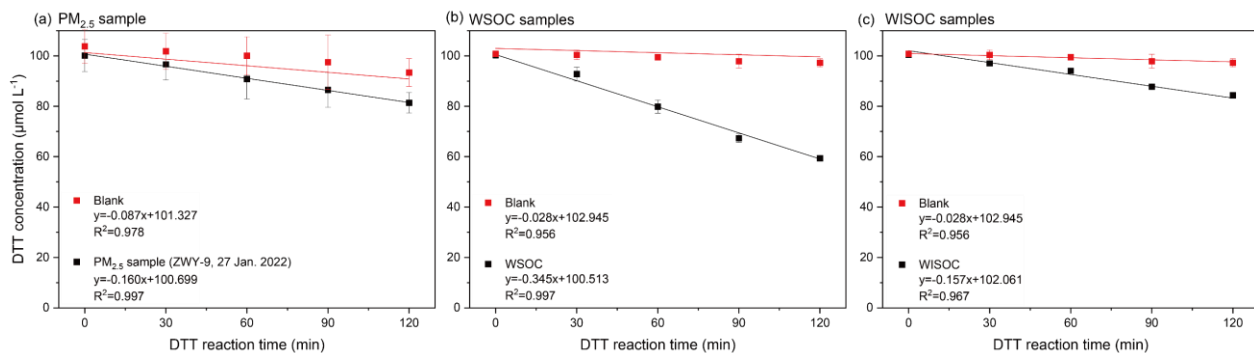

135 **Figure S2. Reproducibility of DTT measurements of samples. (a) DTT measurements of  $\text{PM}_{2.5}$  samples and backgrounds, using the downtown site on January 27, 2022, as an example. (b) DTT measurements of a water-soluble organic carbon (WSOM) quality control sample, which was prepared containing a mixture of all WSOM samples. (c) DTT measurements of a water insoluble organic carbon (WISOM) quality control sample, which was prepared containing a mixture of all WISOM samples.**

140

145

150

155

160

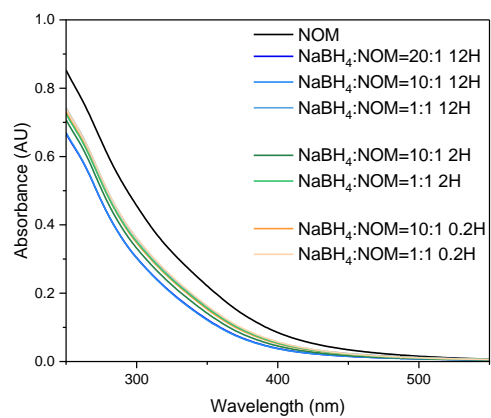

**Figure S3. UV-Vis spectra during SRNOM reduction by NaBH<sub>4</sub>.**

165

170

175

180

185



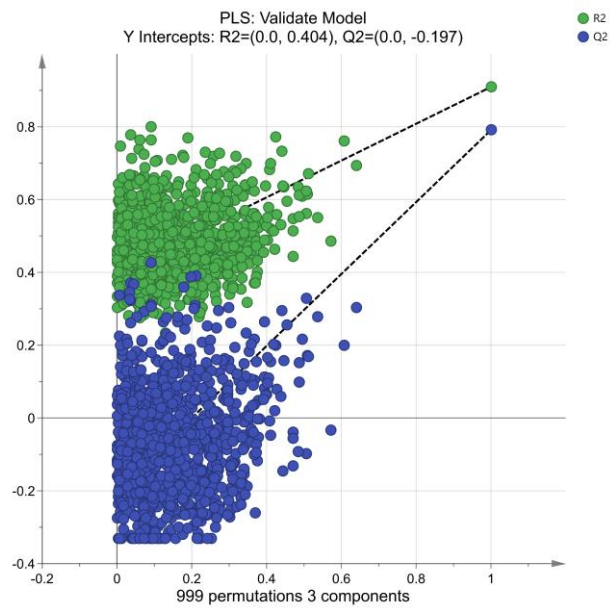

**Figure S4. Validation plot of PLSR model for carbonyl molecules significantly positively correlated with DDToc, n = 999, R2 = (0.0, 0.404), Q2 = (0.0, -0.197).**

190

195

200

205

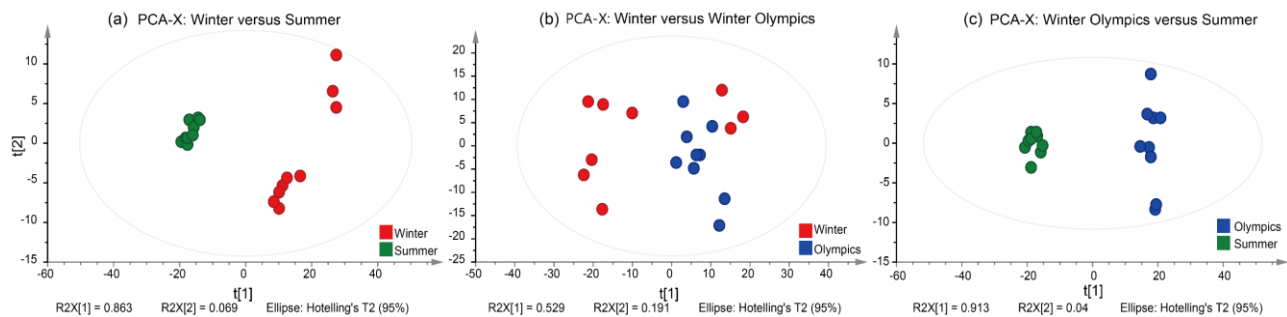

**Figure S5. PCA score plots for pro-oxidative carbonyls in (a) winter versus summer, (b) winter versus winter Olympics, and (c) winter Olympics versus summer samples.**

210

215

220

225

230

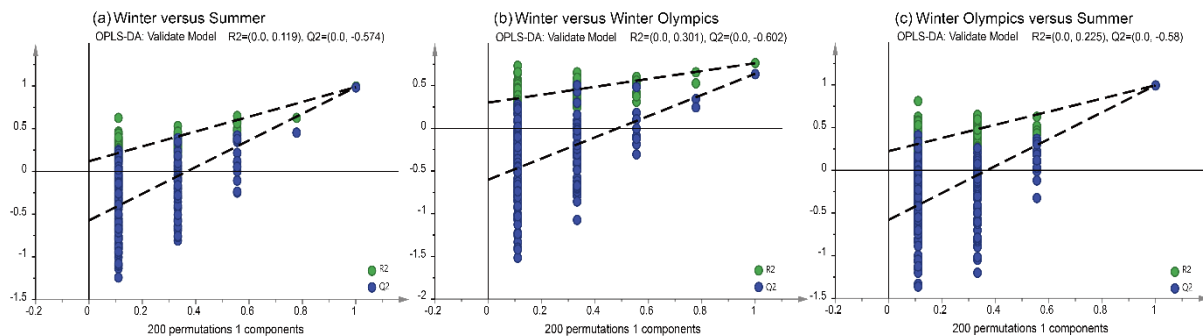

Figure S6. Multivariate OPLS-DA (1 + 1 + 0) models for the pro-oxidative carbonyls were validated by permutation test (n = 200).  
 (a) Validation plot of OPLS-DA model obtained from carbonyl molecules in winter and summer samples, R2 = (0.0, 0.019), Q2 = (0.0, -0.574);  
 (b) Validation plot of OPLS-DA model obtained from carbonyl molecules in winter and Winter Olympic samples, R2 = (0.0, 0.301), Q2 = (0.0, -0.602);  
 (c) Validation plot of OPLS-DA model obtained from carbonyl molecules in winter Olympics and summer samples, R2 = (0.0, 0.225), Q2 = (0.0, -0.58).

235

240

245

250

255

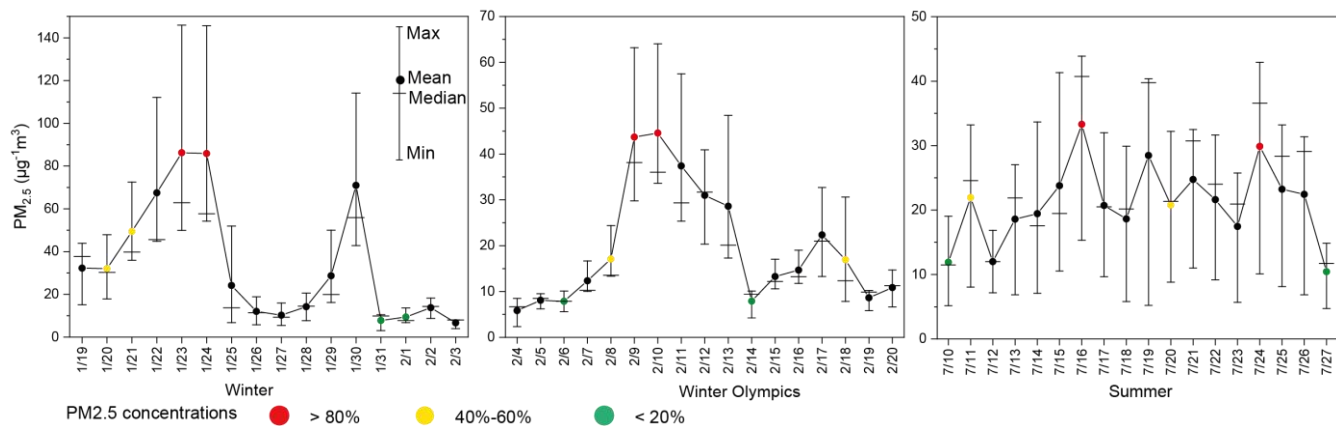

260

**Figure S7. Daily PM<sub>2.5</sub> concentration at the downtown site, suburban site, and montane site in Beijing during each sampling season. The red dots represent the day on which PM<sub>2.5</sub> concentrations exceeded 80% of that sampling season. The yellow dots represent the day on which PM<sub>2.5</sub> concentrations are at 40-60% of that sampling season. The green dots represent the day on which PM<sub>2.5</sub> concentrations are below 20% of that sampling season.**

265

270

275

280

285

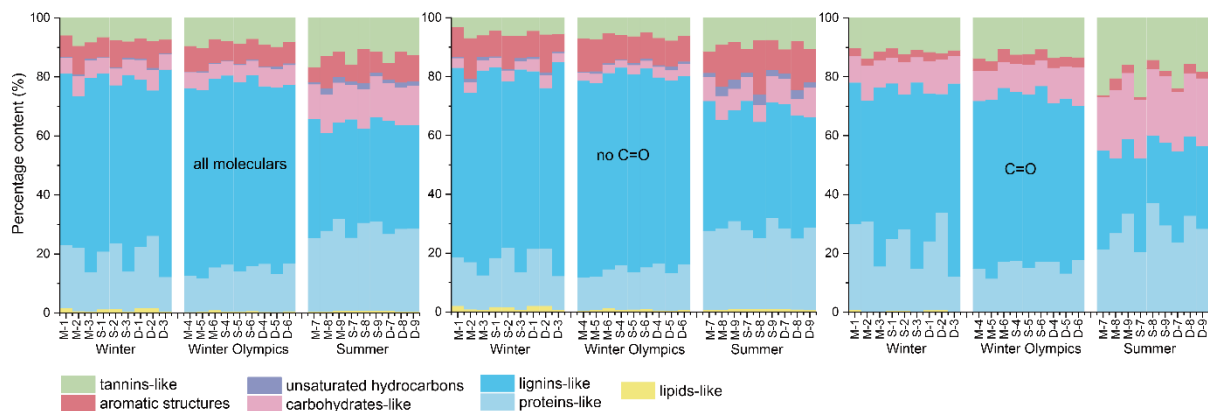

**Figure S8.** The proportion of molecules in seven compounds was estimated based on the normalized molecular intensities. Organic molecules detected in FT-ICP MS were distinguished into seven compounds based on H/C and O/C. (Group1: lipids-like, Group2: proteins-like, Group3: lignins-like, Group4: carbohydrates-like, Group5: unsaturated hydrocarbons, Group6: aromatic structures, Group7: tannins-like).

290

295

300

305

310

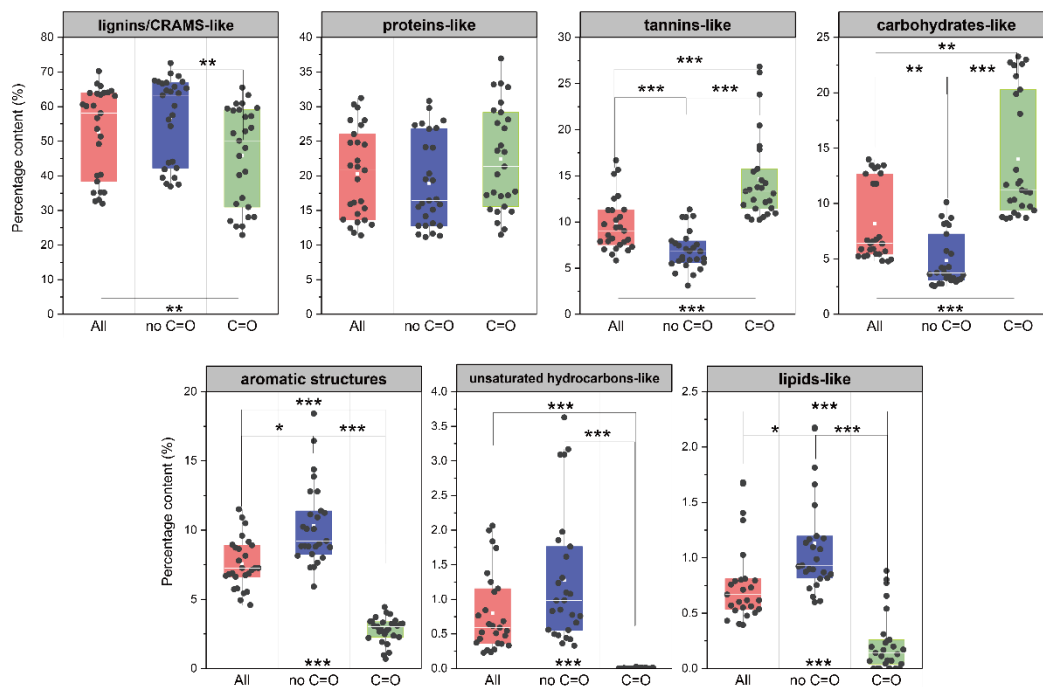

**Figure S9.** Seven compounds differ in the percentage distribution of all organic, non-carbonyl, and carbonyl molecules based on the normalized molecular intensities (Kruskal-Wallis tests, Differences between groups were considered statistically significant when  $p < 0.05$ , with  $0.01 < p < 0.05$  marked by \*;  $p < 0.01$  marked by \*\*; and  $p < 0.001$  marked by \*\*\*).

315

320

325

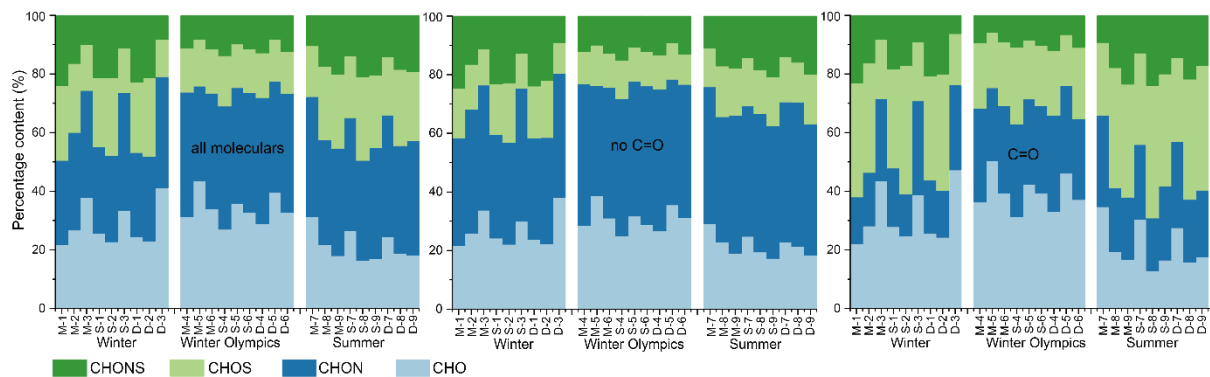

330 **Figure S10.** The proportion of each group in all organic, non-carbonyl, and carbonyl molecules was estimated based on the  
 normalized molecular intensities. Organic molecules detected in FT-ICP MS were divided into four groups according to the  
 elemental composition, namely CHO, CHON, CHOS, and CHONS.

335

340

345

350

355

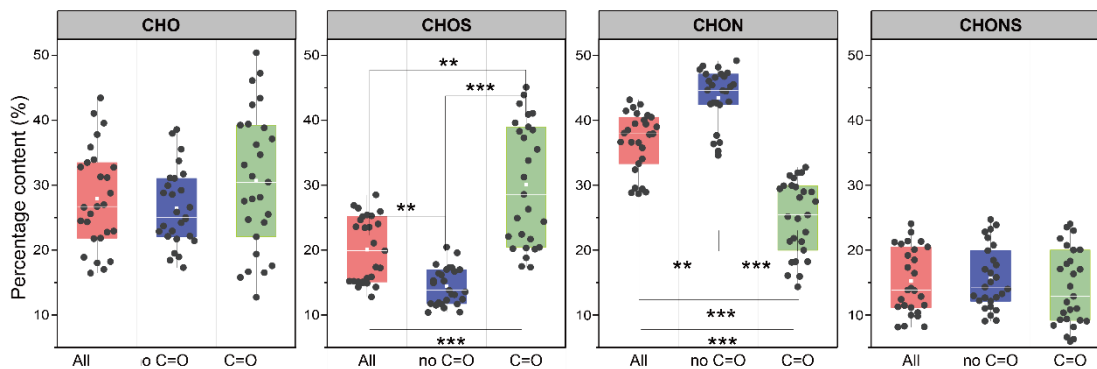

**Figure S11.** Differences in the percentage distribution of elemental composition based on the normalized molecular intensities in all organic, non-carbonyl, and carbonyl molecules (Kruskal-Wallis tests, Differences between groups were considered statistically significant when  $p < 0.05$ , with  $0.01 < p < 0.05$  marked by \*,  $p < 0.01$  marked by \*\*, and  $p < 0.001$  marked by \*\*\*).

360

365

370

375

380



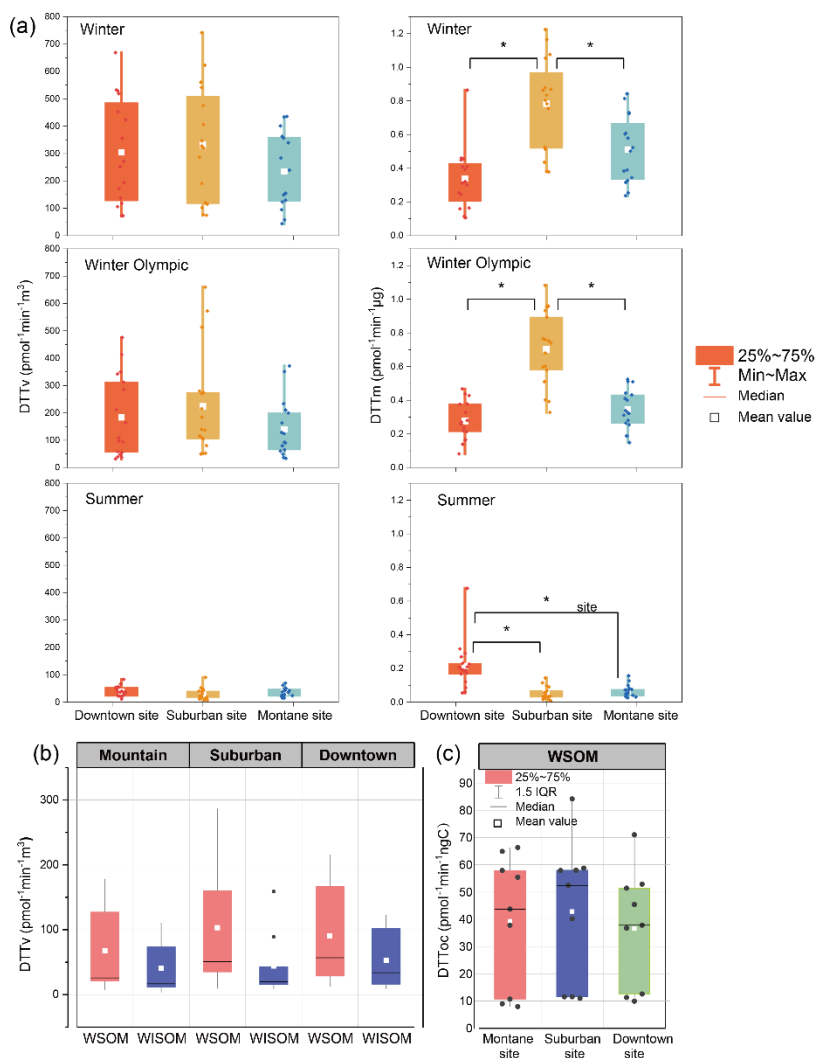

385 **Figure S12. (a) Volume-normalized DTT consumption rate (DTT<sub>v</sub>) and mass-normalized DTT consumption rate (DTT<sub>m</sub>) of organic matter in PM<sub>2.5</sub> at the downtown site, suburban site, and montane site (Kruskal-Wallis tests, Differences between groups were considered statistically significant when  $p < 0.05$ , with  $0.01 < p < 0.05$  marked by \*;  $p < 0.01$  marked by \*\*; and  $p < 0.001$  marked by \*\*\*). (b) DTT<sub>v</sub> of water-soluble organic carbon (WSOM) and organic carbon (WISOM) for representative samples. (c) DTT consumption rate of WSOM normalized by mass concentration of TOC (DTT<sub>oc</sub>).**

390

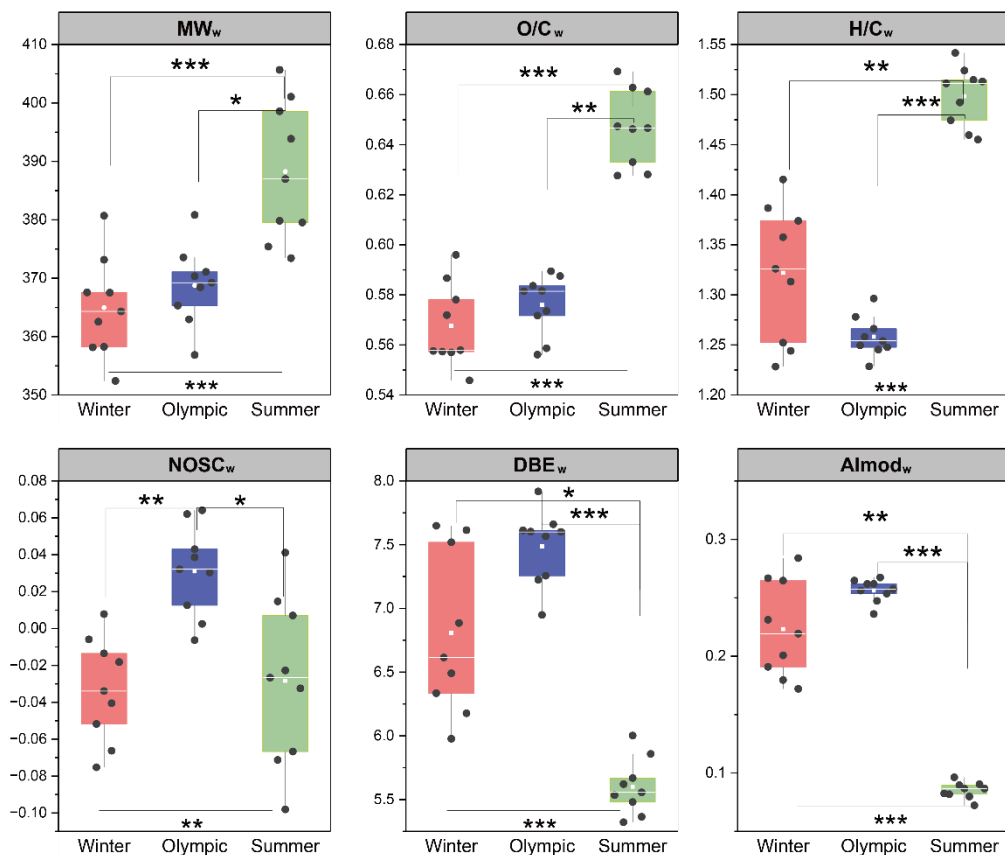

395 **Figure S13. The magnitude-weighted average values of molecular weight (MW<sub>w</sub>), O/C, H/C, the nominal carbon oxidation states (NOSC), double bond equivalence (DBE), and modified aromaticity index (Almod) of carbonyl molecules (Kruskal-Wallis tests, Differences between groups were considered statistically significant when  $p < 0.05$ , with  $0.01 < p < 0.05$  marked by \*;  $p < 0.01$  marked by \*\*; and  $p < 0.001$  marked by \*\*\*).**

400

405

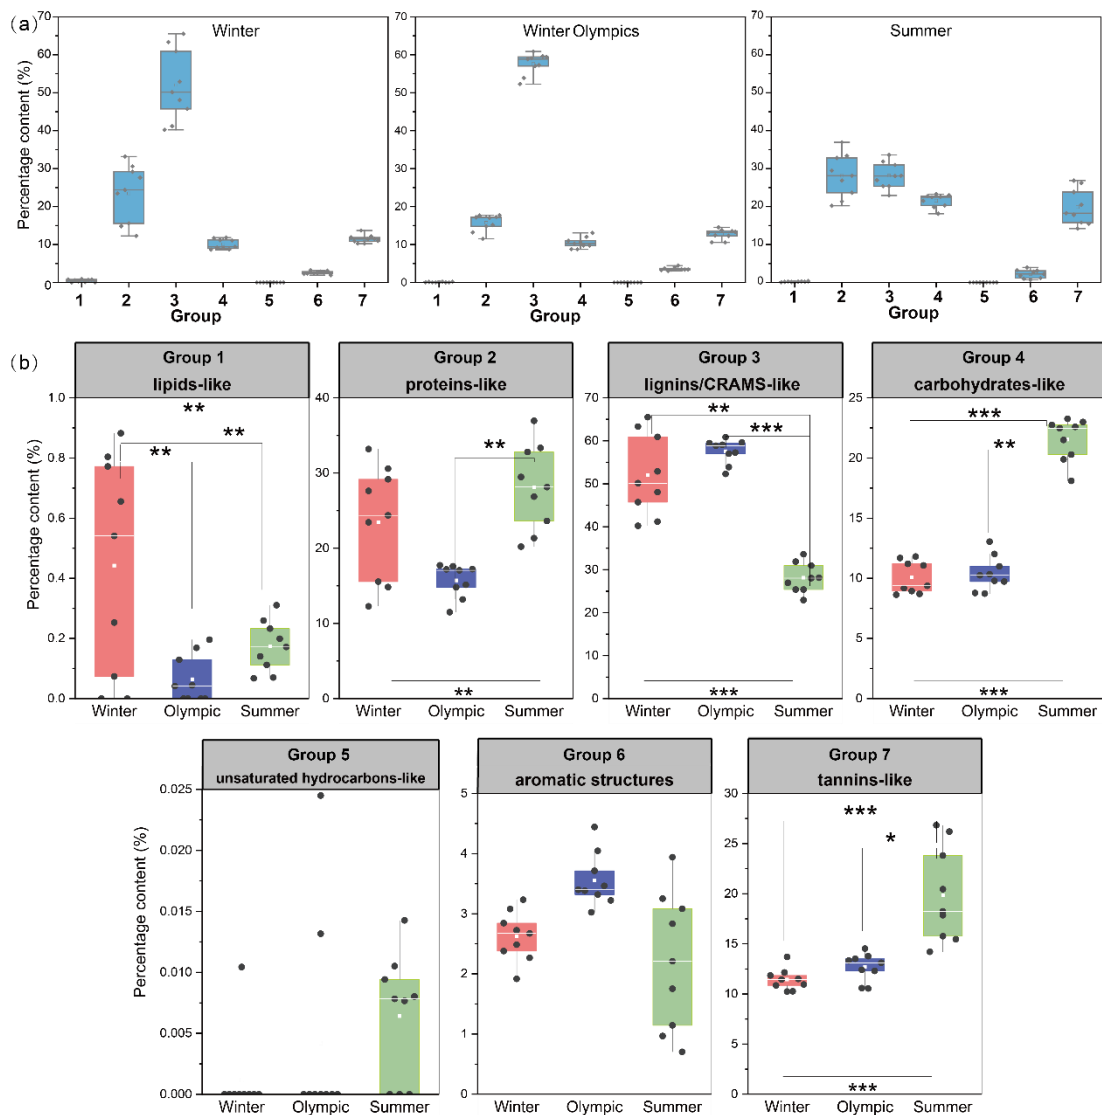

410 **Figure S14.** The difference in the percentage distribution based on the normalized molecular intensities of carbonyl molecules in winter, winter Olympics, and summer samples for the seven compound groups (Group1: lipids-like, Group2: proteins-like, Group3: lignins/CRAMs-like, Group4: carbohydrates-like, Group5: unsaturated hydrocarbons, Group6: aromatic structures, Group7: tannins-like).

415

420

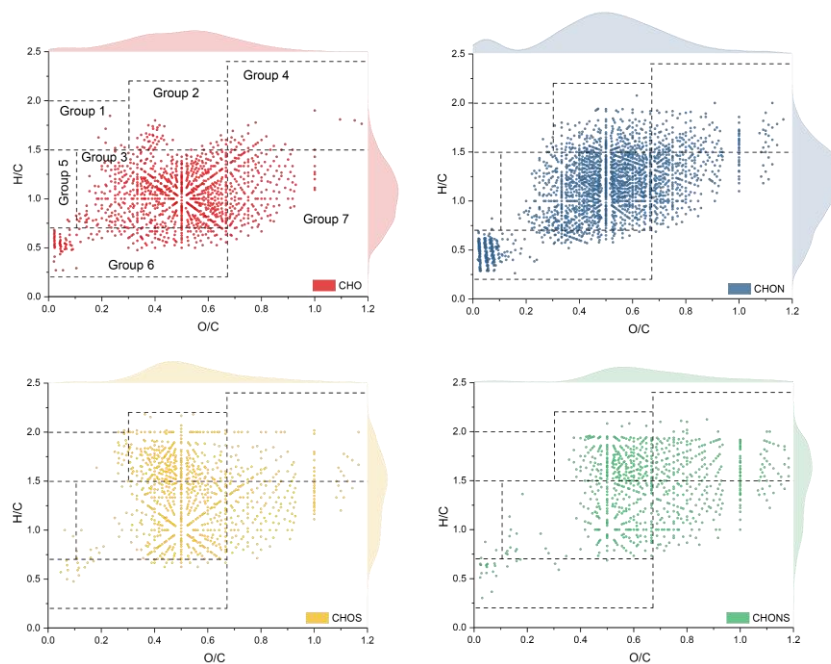

**Figure S15. The van Krevelen diagram of carbonyl molecules from different elemental compositions (Group1: lipids-like, Group2: proteins-like, Group3: lignins/CRAMS-like, Group4: carbohydrates-like, Group5: unsaturated hydrocarbons, Group6: aromatic structures, Group7: tannins-like).**

425

430

435

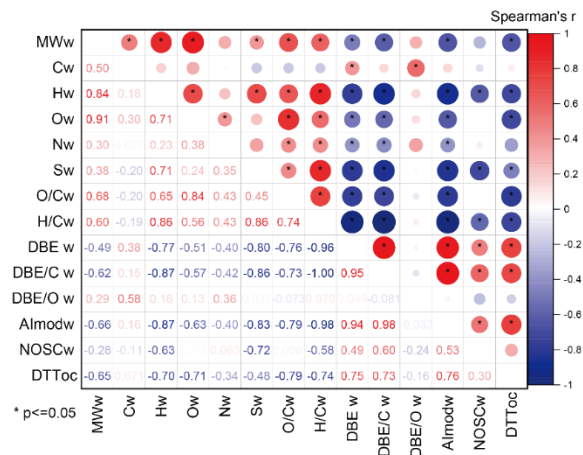

440 **Figure S16. Spearman correlation matrix of carbonyl molecule characteristic parameters and DTT consumption rate of WSOM**  
**normalized by mass concentration of TOC (DTT<sub>TOC</sub>). Colors from blue to red represent changes in the Spearman correlation**  
**coefficient from -1 to 1.**

445

450

455

460

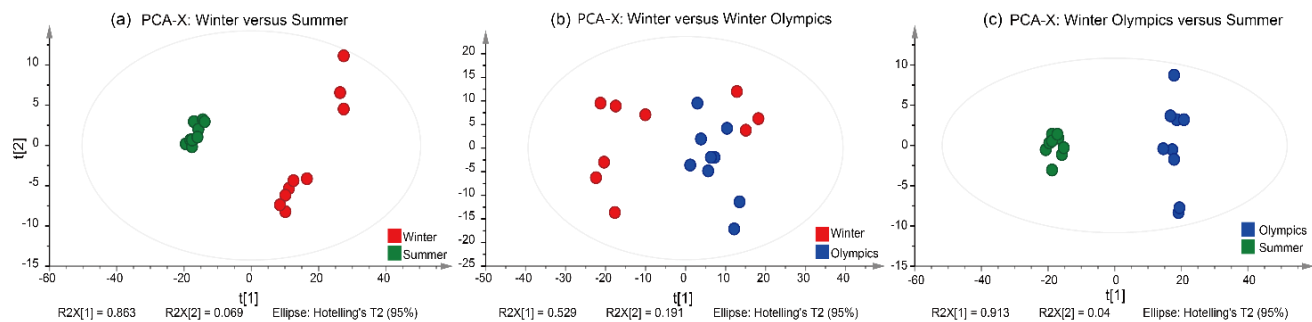

**Figure S17.** OPLS-DA score plots for normalized intensity of individual pro-oxidative carbonyls in (a) winter and winter Olympics, (b) winter and summer, and (c) winter Olympics and summer samples.

## References

- 470 Kroll, J. H., Donahue, N. M., Jimenez, J. L., Kessler, S. H., Canagaratna, M. R., Wilson, K. R., Altieri, K. E., Mazzoleni, L. R., Wozniak, A. S., Bluhm, H., Mysak, E. R., Smith, J. D., Kolb, C. E., and Worsnop, D. R.: Carbon oxidation state as a metric for describing the chemistry of atmospheric organic aerosol, *Nat. Chem.*, 3, 133–139, <https://doi.org/10.1038/nchem.948>, 2011.
- Lv, J., Zhang, S., Wang, S., Luo, L., Cao, D., and Christie, P.: Molecular-Scale Investigation with ESI-FT-ICR-MS on Fractionation of Dissolved Organic Matter Induced by Adsorption on Iron Oxyhydroxides, *Environ. Sci. Technol.*, 50, 2328–2336, <https://doi.org/10.1021/acs.est.5b04996>, 2016.
- 475 Phillips, S. M. and Smith, G. D.: Light Absorption by Charge Transfer Complexes in Brown Carbon Aerosols, *Environ. Sci. Technol. Lett.*, 1, 382–386, <https://doi.org/10.1021/ez500263j>, 2014.
- Phillips, S. M. and Smith, G. D.: Further Evidence for Charge Transfer Complexes in Brown Carbon Aerosols from Excitation–Emission Matrix Fluorescence Spectroscopy, *J. Phys. Chem. A*, 119, 4545–4551, <https://doi.org/10.1021/jp510709e>, 2015.
- 480 Wang, L., Lin, Y., Ye, L., Qian, Y., Shi, Y., Xu, K., Ren, H., and Geng, J.: Microbial Roles in Dissolved Organic Matter Transformation in Full-Scale Wastewater Treatment Processes Revealed by Reactomics and Comparative Genomics, *Environ. Sci. Technol.*, 55, 11294–11307, <https://doi.org/10.1021/acs.est.1c02584>, 2021.
- 485 Zhang, Q., Ma, H., Li, J., Jiang, H., Chen, W., Wan, C., Jiang, B., Dong, G., Zeng, X., Chen, D., Lu, S., You, J., Yu, Z., Wang, X., and Zhang, G.: Nitroaromatic Compounds from Secondary Nitrate Formation and Biomass Burning Are Major Proinflammatory Components in Organic Aerosols in Guangzhou: A Bioassay Combining High-Resolution Mass Spectrometry Analysis, *Environ. Sci. Technol.*, <https://doi.org/10.1021/acs.est.3c04983>, 2023.
